# Supplementary material
Source: publisher figshare collection journal article supplement (https://sage.figshare.com/ndownloader/files/21715470)
Supplement: Supplementary file 1 [file 21715470]

**Supplementary Materials**

**Materials and procedures for “Chinese Cities Task”**

*Materials:*

Work in small groups. Each group collects and presents information about one of seven cities in China: Beijing, Shanghai, Guangzhou, Xi’an, Hangzhou, Lhasa and Shijiazhuang. We are going to explore facts about each city relating to its geography, climate, transportation, attractions and unique features, and finally we will produce a profile of each city.

| **Basic Facts** | **Useful Words** |
| --- | --- |
| **Geography** | cover, adjoin, equal, lie, encompass, consist of, border, run through, flow, form |
| **Climate** | enjoy, go up to, last, increase, blow, vary, occur, come, decrease, change |
| **Transportation** | take, service, offer, connect, remain, enable, become, run, consist of |
| **Attractions** | remain, represent / reflect, show, boast, contain, attract / draw |
| **Unique Features** | provide, emphasize, serve as, show off, draw, hold, possess, date back |

*Procedures*:

- 1. Students worked in seven groups. Each group collected information about basic facts about a Chinese city prior to the task session.
  2. Group leaders were appointed at the outset of the task performance. The leaders led a group discussion on how to present the information using the given words.
  3. The leaders took turns to come to the front of the class and reported the basic facts they knew about the city.
  4. The teacher listened and asked for more information about the city. He recast any utterance containing a 3rd person -*s* error.
  5. The other groups listened carefully and took notes. When they missed a point, they were allowed to ask the speaker for clarification.
  6. The teacher asked some of the students (especially those who had not interacted with the teacher yet) to report what they had learned about one of the seven Chinese cities.
  7. The teacher took this opportunity to recast any utterance containing a 3rd person -*s* error.
  8. Finally, the teacher and the participants worked together to produce a profile for each city on the basis of their notes.

**Sentences used in the Elicited Imitation Test (EIT)**

1. * A good teacher **know** every student **grows** at his own pace.

2. He **makes** lessons interesting and **cares** about his students.

3. * When he **call** a student by his full name, it always **mean** trouble.

4. He **loves** comic books and is always reading them.

5. * The Americans were first to land on the moon, **didn’t they**?

6. * They bring more **problem** than **solutions** to the world.

7. An American invented the software **that changed the world**.

8. A child **needs** a role model, but not a supermodel.

9. In China a child often **visits** clubs and **drinks** a lot.

10. * A child **take** advice from everyone but his parents.

11. * Nobody **like** *Aftershock*, the film by Feng Xiaogang.

12. It **tells** the story of the Tangshan Earthquake.

13. * The quake **destroyed** many houses and **kill** many people.

14. Last **year’s** earthquakes shocked the whole world.

15. A wise man **keeps** his eyes half-closed after marriage.

16. * He **return** home as early as possible every day.

17. * A responsible man **take** good care of his children.

18. He used to ask, “**Does the tie go with my shirt**?”

**Untimed Grammaticality Judgment Test (UGJT)**

**Instructions:** *In this section, you are expected first to decide whether each sentence is grammatically correct or incorrect for written English. Then, indicate your certainty of judgment by marking a level in a 6-point scale. 0 means that you are totally uncertain and 5 means that you are 100% confident. After that, indicate whether you have judged it by “rule” or by “feel”. Finally, if the sentence is ungrammatical, please correct it if you can. There is no time control in this section, so you can take your time to double-check your answers before turning over to the next page for a new item.*

1. My father takes something to read when he goes to the doctor’s.

Grammaticality: A. correct B. incorrect

Certainty of judgment: very uncertain 0 1 2 3 4 5 very certain

Judgment by: A. rule B. feel

If ungrammatical, correct it here: .

2. Everybody like Jack because he is good at telling stories.

Grammaticality: A. correct B. incorrect

Certainty of judgment: very uncertain 0 1 2 3 4 5 very certain

Judgment by: A. rule B. feel

If ungrammatical, correct it here: .

3. She remembers exactly everything that has happened to her.

Grammaticality: A. correct B. incorrect

Certainty of judgment: very uncertain 0 1 2 3 4 5 very certain

Judgment by: A. rule B. feel

If ungrammatical, correct it here: .

4. We’re going to the bookstore in John car this afternoon.

Grammaticality: A. correct B. incorrect

Certainty of judgment: very uncertain 0 1 2 3 4 5 very certain

Judgment by: A. rule B. feel

If ungrammatical, correct it here: .

5. The driver often remind passengers to take their belongings when they leave.

Grammaticality: A. correct B. incorrect

Certainty of judgment: very uncertain 0 1 2 3 4 5 very certain

Judgment by: A. rule B. feel

If ungrammatical, correct it here: .

6. The seaside here attracts a lot of tourists every summer.

Grammaticality: A. correct B. incorrect

Certainty of judgment: very uncertain 0 1 2 3 4 5 very certain

Judgment by: A. rule B. feel

If ungrammatical, correct it here: .

7. Every noon the sunlight comes in and lights up the whole room.

Grammaticality: A. correct B. incorrect

Certainty of judgment: very uncertain 0 1 2 3 4 5 very certain

Judgment by: A. rule B. feel

If ungrammatical, correct it here: .

8. My brother is fortunate to find a job that he love very much.

Grammaticality: A. correct B. incorrect

Certainty of judgment: very uncertain 0 1 2 3 4 5 very certain

Judgment by: A. rule B. feel

If ungrammatical, correct it here: .

9. Only you can persuade Alice to give up her foolish idea.

Grammaticality: A. correct B. incorrect

Certainty of judgment: very uncertain 0 1 2 3 4 5 very certain

Judgment by: A. rule B. feel

If ungrammatical, correct it here: .

10. We learn language by making and correcting mistakes.

Grammaticality: A. correct B. incorrect

Certainty of judgment: very uncertain 0 1 2 3 4 5 very certain

Judgment by: A. rule B. feel

If ungrammatical, correct it here: .

11. Although I’m 20 years old, my grandpa still treat me like a child.

Grammaticality: A. correct B. incorrect

Certainty of judgment: very uncertain 0 1 2 3 4 5 very certain

Judgment by: A. rule B. feel

If ungrammatical, correct it here: .

12. My wife used to ask, “Do you like my new shoes?”

Grammaticality: A. correct B. incorrect

Certainty of judgment: very uncertain 0 1 2 3 4 5 very certain

Judgment by: A. rule B. feel

If ungrammatical, correct it here: .

13. Life in the future will be much easier.

Grammaticality: A. correct B. incorrect

Certainty of judgment: very uncertain 0 1 2 3 4 5 very certain

Judgment by: A. rule B. feel

If ungrammatical, correct it here: .

14. The house belongs to my aunt but she seldom live here.

Grammaticality: A. correct B. incorrect

Certainty of judgment: very uncertain 0 1 2 3 4 5 very certain

Judgment by: A. rule B. feel

If ungrammatical, correct it here: .

15. This is not a big shop but it offers more personal service.

Grammaticality: A. correct B. incorrect

Certainty of judgment: very uncertain 0 1 2 3 4 5 very certain

Judgment by: A. rule B. feel

If ungrammatical, correct it here: .

16. We will have to wait all day unless the doctor work faster.

Grammaticality: A. correct B. incorrect

Certainty of judgment: very uncertain 0 1 2 3 4 5 very certain

Judgment by: A. rule B. feel

If ungrammatical, correct it here: .

17. The lawyer always wears a suit in spring.

Grammaticality: A. correct B. incorrect

Certainty of judgment: very uncertain 0 1 2 3 4 5 very certain

Judgment by: A. rule B. feel

If ungrammatical, correct it here: .

18. My parents want kicking me out of the house.

Grammaticality: A. correct B. incorrect

Certainty of judgment: very uncertain 0 1 2 3 4 5 very certain

Judgment by: A. rule B. feel

If ungrammatical, correct it here: .
